# Supplementary material for: Cationic Amphiphilic Drugs Are Potent Inhibitors of Yeast Sporulation
Source: PLoS One. 2012 Aug 8;7(8):e42853. doi: 10.1371/journal.pone.0042853 (PMC3414501; doi:10.1371/journal.pone.0042853)
Supplement: Table S1 — Complete set of screening data for 446 organic compounds. The names, stock concentrations, chemical database identifier and sensitivity scores calculated for the growth assay, CDA2 assay, and the his4 assay are listed for the 446 compounds in the NIH clinical collection (NCC). Chemicals are shown in order of their position in the NCC library. (XLS) [file pone.0042853.s006.xls]

## Sheet: Table S1
#	Name	Stock concentration	Unit	Source plate	Source Well	Pubchem ID	Compound ID	Drugbank ID	Sensitivity score for wild-type growth	Inhibits wild-type growth?	Sensitivity score for AD1-9 growth	Inhibits AD1-9 growth?	Sensitivity score for CDA2 assay	Standard deviation of CDA2 assay	Inhibits CDA2 assay?	Autofluorescence?	Sensitivity score for HIS4 assay	Inhibits HIS4 assay?
1	Nalbuphine	10	mM	NGP-001-01	A02	CPD000449281	23581814	DB00844	-0.96	NO	-1.74	NO	-0.4	0.04	NO	NO	-0.56	NO
2	Flurbiprofen	11.4	mM	NGP-001-01	A03	CPD000042823	3394	NA	0.01	NO	0.77	NO	-0.22	0.03	NO	NO	-0.16	NO
3	Famotidine	10	mM	NGP-001-01	A04	CPD000058961	5702160	DB00927	-0.98	NO	-2.06	YES	0.3	0.03	NO	NO	-0.42	NO
4	Salbutamol sulfate	9.7	mM	NGP-001-01	A05	CPD000058513	9884233	DB01001	-0.62	NO	-1.51	NO	-0.05	0.04	NO	NO	-0.65	NO
5	Prochlorperazine	10.4	mM	NGP-001-01	A06	CPD000466275	6436057	NA	146.37	YES	-58.36	YES	2.72	0.06	NO	NO	-2.14	NO
6	Bifemelane	10	mM	NGP-001-01	A07	CPD000449269	6917789	NA	3.54	YES	126.99	YES	1.21	0.07	NO	NO	9.23	YES
7	Cotinine	10	mM	NGP-001-01	A08	CPD000449278	854019	NA	0.49	NO	1.38	NO	-0.11	0.04	NO	NO	-1.15	NO
8	Pizotyline	10	mM	NGP-001-01	A09	CPD000466272	11718531	NA	5.7	YES	160.85	YES	-0.44	0.07	NO	NO	9.23	YES
9	Ketoconazole	10	mM	NGP-001-01	A10	CPD000058460	456201	DB01026	35.26	YES	155	YES	0.13	0.06	NO	NO	-1.74	NO
10	Pramipexole	10	mM	NGP-001-01	A11	CPD000449298	119570	DB00413	-0.06	NO	50.97	YES	-1.03	0.04	NO	NO	-2.92	NO
11	Raclopride	10	mM	NGP-001-01	B02	CPD000449275	3033769	NA	0.66	NO	-1.88	NO	0.74	0.03	NO	NO	-0.66	NO
12	Deferiprone	10	mM	NGP-001-01	B03	CPD000059136	2972	NA	0.2	NO	-1.63	NO	2.38	0.03	NO	NO	-0.12	NO
13	SR 57227A	10	mM	NGP-001-01	B04	CPD000449299	131746	NA	-0.16	NO	-0.47	NO	13.82	0.17	YES	NO	2.37	NO
14	Vesamicol hydrochloride	10	mM	NGP-001-01	B05	CPD000057879	6603219	NA	-0.16	NO	-0.57	NO	1.08	0.05	NO	NO	-0.31	NO
15	Amiridine	10	mM	NGP-001-01	B06	CPD000449322	604519	NA	4.93	YES	4.09	YES	2.39	0.08	NO	NO	1.51	NO
16	CGS 15943	10	mM	NGP-001-01	B07	CPD000449284	2690	NA	5.26	YES	17.59	YES	-3.14	0.12	NO	NO	-0.12	NO
17	D-Cycloserine	10	mM	NGP-001-01	B08	CPD000058313	6234	NA	1.58	NO	1.38	NO	0.63	0.07	NO	NO	-5.18	NO
18	Beta-Estradiol	10	mM	NGP-001-01	B09	CPD000059126	5757	NA	3.35	YES	10.26	YES	0.49	0.04	NO	NO	-2.13	NO
19	Tripelennamine hydrochloride	10	mM	NGP-001-01	B10	CPD000058623	9066	DB00792	1.04	NO	0.66	NO	0.92	0.06	NO	NO	8.14	YES
20	Lidocaine	9.6	mM	NGP-001-01	B11	CPD000058189	3676	DB00281	-0.16	NO	-0.9	NO	0.09	0.04	NO	NO	-2.75	NO
21	Zacopride	10	mM	NGP-001-01	C02	CPD000449271	19849157	NA	-1.3	NO	-2.46	YES	2.91	0.03	NO	NO	-2.43	NO
22	Loxapine succinate	11	mM	NGP-001-01	C03	CPD000058470	71399	DB00408	1.9	NO	6.01	YES	2.27	0.04	NO	NO	7.41	YES
23	Pancuronium	8.7	mM	NGP-001-01	C04	CPD000466270	23581810	DB01337	-0.39	NO	-8.57	YES	2.51	0.03	NO	NO	-0.44	NO
24	Sesquiterpene	10	mM	NGP-001-01	C05	CPD000469289	6473767	NA	0.03	NO	-2.67	YES	2.37	0.04	NO	NO	0.43	NO
25	Clotrimazole	10	mM	NGP-001-01	C06	CPD000058306	2812	DB00257	62.75	YES	2.49	YES	3.7	0.07	NO	NO	-0.98	NO
26	Cinanserin	10	mM	NGP-001-01	C07	CPD000449287	23581800	NA	1.35	NO	41.75	YES	1.28	0.07	NO	NO	7.73	YES
27	Fluvoxamine	7.7	mM	NGP-001-01	C08	CPD000466268	5281089	DB00176	2.43	YES	9.45	YES	-1.51	0.07	NO	NO	8.08	YES
28	Hexamethylene bisacetamide	10	mM	NGP-001-01	C09	CPD000059046	3616	NA	1.69	NO	1.99	NO	0.71	0.04	NO	NO	-0.63	NO
29	MLS001401451	8.2	mM	NGP-001-01	C10	CPD000449325	23581809	NA	1.27	NO	4.88	YES	6.05	0.11	YES	NO	2.44	NO
30	Indomethacin	10.5	mM	NGP-001-01	C11	CPD000449290	23581802	DB00328	0.62	NO	0.93	NO	0.38	0.04	NO	NO	0.4	NO
31	SKF 83566	10	mM	NGP-001-01	D02	CPD000449276	23581817	NA	-0.06	NO	-0.77	NO	9.33	0.14	YES	NO	4.5	NO
32	Dextromethorphan hydrobromide	8.2	mM	NGP-001-01	D03	CPD000326694	5462351	NA	-0.39	NO	-0.05	NO	14.06	0.17	YES	NO	5.52	YES
33	Metronidazole	10	mM	NGP-001-01	D04	CPD000058175	4173	DB00916	-0.2	NO	-0.99	NO	0.28	0.03	NO	NO	0.15	NO
34	Terazosin	9.5	mM	NGP-001-01	D05	CPD000449268	9803362	DB01162	-0.03	NO	-0.95	NO	3.45	0.05	NO	NO	0.92	NO
35	Loratadine	10	mM	NGP-001-01	D06	CPD000058255	3957	DB00455	334.68	YES	-58.36	YES	3.83	0.06	NO	NO	-1.19	NO
36	Cisapride	10.5	mM	NGP-001-01	D07	CPD000449272	6917697	DB00604	1.35	NO	8.05	YES	0.78	0.09	NO	NO	-0.37	NO
37	Doxepin	10	mM	NGP-001-01	D08	CPD000449270	5281088	DB01142	1.16	NO	5.43	YES	18.22	0.25	YES	NO	3.87	NO
38	Diphenhydramine hydrochloride	10	mM	NGP-001-01	D09	CPD000058353	8980	DB01075	0.81	NO	3.46	YES	2.11	0.06	NO	NO	8.82	YES
39	Tacrine hydrochloride	9	mM	NGP-001-01	D10	CPD000059105	2723754	NA	2.93	YES	-5.79	YES	10.21	0.17	YES	NO	-2.37	NO
40	LY 171883	10	mM	NGP-001-01	D11	CPD000058555	3969	NA	1.14	NO	5.49	YES	-1.99	0.04	NO	NO	-2.23	NO
41	3-Deoxydenosine	10	mM	NGP-001-01	E02	CPD000449316	23581797	NA	1.06	NO	110.15	YES	19.92	0.22	YES	NO	7.05	YES
42	Duloxetine	10	mM	NGP-001-01	E03	CPD000449282	60835	DB00476	11	YES	99.57	YES	1.64	0.04	NO	NO	-1.33	NO
43	MLS001076136	7.3	mM	NGP-001-01	E04	CPD000449327	23581798	NA	-0.06	NO	-1.56	NO	-0.1	0.03	NO	NO	-0.64	NO
44	Diphenylcyclopropenone	10	mM	NGP-001-01	E05	CPD000449319	65057	NA	39.88	YES	109.83	YES	0.85	0.05	NO	NO	-0.87	NO
45	Phenelzine sulfate salt	10	mM	NGP-001-01	E06	CPD000058500	61100	DB00780	0.3	NO	-0.66	NO	1.83	0.08	NO	NO	-3.78	NO
46	Indatraline	10	mM	NGP-001-01	E07	CPD000449273	10314472	NA	-33.14	YES	-58.36	YES	2.43	0.06	NO	NO	-0.83	NO
47	Trifluoperazine dihydrochloride	10	mM	NGP-001-01	E08	CPD000059133	2913535	DB00831	-33.14	YES	-58.36	YES	-0.39	0.07	NO	NO	-2.62	NO
48	Galanthamine	8.8	mM	NGP-001-01	E09	CPD000449267	121587	NA	0.11	NO	-1.27	NO	-0.36	0.05	NO	NO	-0.9	NO
49	Ethynylestradiol	10	mM	NGP-001-01	E10	CPD000058319	5991	NA	2.85	YES	228.66	YES	6.44	0.1	NO	NO	-1.32	NO
50	Paroxetine	8.8	mM	NGP-001-01	E11	CPD000466269	6435921	DB00715	1.33	NO	117.81	YES	-1.35	0.07	NO	NO	9.22	YES
51	AM 404	10	mM	NGP-001-01	F02	CPD000449274	6604822	NA	2.55	YES	-58.36	YES	-4.74	0.06	NO	NO	-0.8	NO
52	Acetorphan	10	mM	NGP-001-01	F03	CPD000449320	107751	NA	0.93	NO	22.08	YES	0.9	0.03	NO	NO	1.65	NO
53	MLS000758282	10	mM	NGP-001-01	F04	CPD000449323	23581799	NA	0.01	NO	0.32	NO	2.38	0.05	NO	NO	-0.5	NO
54	Procysteine	10	mM	NGP-001-01	F05	CPD000449326	72390	NA	-0.31	NO	-2.4	YES	0.97	0.03	NO	NO	-0.93	NO
55	Riluzole	9.9	mM	NGP-001-01	F06	CPD000449311	6419992	DB00740	5.49	YES	15.44	YES	16.89	0.17	YES	NO	6.83	YES
56	Trazodone hydrochloride	10	mM	NGP-001-01	F07	CPD000058520	62935	DB00656	0.24	NO	-3.23	YES	5.45	0.09	NO	NO	-0.45	NO
57	Levorphanol tartrate	7.6	mM	NGP-001-01	F08	CPD000058908	5388990	NA	-0.24	NO	-1.11	NO	-2.67	0.04	NO	NO	-1.13	NO
58	Ifenprodil	9.2	mM	NGP-001-01	F09	CPD000449296	23581801	NA	3.06	YES	44.87	YES	16.13	0.23	YES	NO	4.63	NO
59	Cytarabine	10	mM	NGP-001-01	F10	CPD000449317	6253	NA	-0.01	NO	-2.83	YES	-0.45	0.04	NO	NO	-0.49	NO
60	Epigallocatechin gallate	10	mM	NGP-001-01	F11	CPD000449288	65064	DB03823	0.97	NO	-3.35	YES	-1.44	0.07	NO	NO	0.29	NO
61	Pilocarpine hydrochloride	10	mM	NGP-001-01	G02	CPD000059053	5909	DB01085	0.72	NO	0.16	NO	1.83	0.03	NO	NO	-0.54	NO
62	Diclofenac	10	mM	NGP-001-01	G03	CPD000449318	5018304	NA	1.48	NO	4.97	YES	0.82	0.03	NO	NO	0.28	NO
63	Selegiline	10	mM	NGP-001-01	G04	CPD000449328	26758	NA	0.07	NO	-1.83	NO	-0.13	0.04	NO	NO	0.06	NO
64	Mesoridazine	10	mM	NGP-001-01	G05	CPD000466274	36207	DB00933	66.05	YES	278.42	YES	-0.29	0.05	NO	NO	-1.59	NO
65	Naltrindole	10	mM	NGP-001-01	G06	CPD000449312	23581811	NA	-1.11	NO	-3.12	YES	3.11	0.09	NO	NO	-0.51	NO
66	Prazosin	10	mM	NGP-001-01	G07	CPD000449301	19846442	DB00457	-0.58	NO	2.31	YES	1.07	0.05	NO	NO	-0.48	NO
67	omega-N-Methylarginine	9.3	mM	NGP-001-01	G08	CPD000449329	135242	NA	-0.56	NO	-3.59	YES	1.34	0.07	NO	NO	-0.29	NO
68	Tetraethylthiuram disulfide	10	mM	NGP-001-01	G09	CPD000059171	3117	NA	-33.14	YES	-58.36	YES	-1.5	0.07	NO	NO	-2.95	NO
69	Methotrexate	14.6	mM	NGP-001-01	G10	CPD000449324	165528	NA	-0.16	NO	-2.15	YES	-2.22	0.12	NO	NO	0.19	NO
70	Mesalamine	10	mM	NGP-001-01	G11	CPD000145728	4075	NA	-0.33	NO	-2.51	YES	-1.48	0.05	NO	NO	-2.13	NO
71	Nifedipine	10.7	mM	NGP-001-01	H02	CPD000058291	4485	DB01115	4.28	YES	59.95	YES	3.14	0.11	NO	NO	1.3	NO
72	Progesterone	10	mM	NGP-001-01	H03	CPD000058345	5994	DB00396	4.04	YES	111.87	YES	16.19	0.21	YES	NO	6.09	YES
73	Capsaicin	10	mM	NGP-001-01	H04	CPD000449294	1548942	NA	3.2	YES	25.81	YES	-1.12	0.07	NO	NO	2.12	NO
74	Zardaverine	11.7	mM	NGP-001-01	H05	CPD000449313	5723	NA	1.71	NO	2.67	YES	1.43	0.04	NO	NO	-0.18	NO
75	Nornicotine	10	mM	NGP-001-01	H06	CPD000449277	412	NA	0.91	NO	-0.25	NO	2.1	0.06	NO	NO	-1.18	NO
76	Urapidil hydrochloride	10	mM	NGP-001-01	H07	CPD000058525	167980	NA	0.85	NO	-0.84	NO	1.04	0.05	NO	NO	-0.7	NO
77	Maprotilline hydrochloride	10	mM	NGP-001-01	H08	CPD000148117	71478	NA	2.3	YES	86.62	YES	0.21	0.07	NO	NO	9.12	YES
78	Piribedil	9.7	mM	NGP-001-01	H09	CPD000449302	23581808	NA	1.65	NO	-3.77	YES	6.47	0.1	NO	NO	-0.82	NO
79	TFMPP	10	mM	NGP-001-01	H10	CPD000449305	3084246	NA	1.25	NO	2.22	YES	0.69	0.06	NO	NO	8.84	YES
80	Etomoxir	10	mM	NGP-001-01	H11	CPD000449321	123823	NA	1.54	NO	8.16	YES	5.49	0.09	NO	NO	-1.14	NO
81	Cephalexin monohydrate	10	mM	NGP-001-02	A02	CPD000338536	27447	DB00567	0.27	NO	-0.53	NO	-1.64	0.06	NO	NO	-1.5	NO
82	Troxipide	10.1	mM	NGP-001-02	A03	CPD000466385	5597	NA	0.38	NO	-0.49	NO	-0.11	0.04	NO	NO	-0.27	NO
83	Levosulpiride	10	mM	NGP-001-02	A04	CPD000466366	688272	NA	0.25	NO	-0.24	NO	0.11	0.03	NO	NO	0.77	NO
84	Alprazolam	10	mM	NGP-001-02	A05	CPD000149316	2118	DB00404	0.23	NO	5.38	YES	0.37	0.04	NO	NO	1.57	NO
85	Docetaxel	10	mM	NGP-001-02	A06	CPD000059010	11970251	DB01248	1.16	NO	-0.53	NO	-0.23	0.07	NO	NO	-1.69	NO
86	Methyltestosterone	10	mM	NGP-001-02	A07	CPD000058528	6010	NA	3.83	YES	32.28	YES	3.87	0.15	NO	NO	2.7	NO
87	Moclobemide	10	mM	NGP-001-02	A08	CPD000012114	4235	NA	-0.18	NO	0.15	NO	0.72	0.03	NO	NO	-1.83	NO
88	Flubendazole	10	mM	NGP-001-02	A09	CPD000466360	35802	NA	2.6	YES	12.33	YES	0.4	0.05	NO	NO	-2.01	NO
89	Piceid	10	mM	NGP-001-02	A10	CPD000466371	5281718	NA	-0.24	NO	0.32	NO	0.56	0.04	NO	NO	-1.14	NO
90	Gabexate mesylate	7.7	mM	NGP-001-02	A11	CPD000058918	6604561	NA	1.03	NO	10.77	YES	2.43	0.08	NO	NO	2.41	NO
91	Pidotimod	10	mM	NGP-001-02	B02	CPD000466390	65944	NA	-1.4	NO	0.59	NO	0.46	0.03	NO	NO	-0.31	NO
92	Actarit	10	mM	NGP-001-02	B03	CPD000466341	2018	NA	-2	NO	0.98	NO	0.84	0.03	NO	NO	0.62	NO
93	Pemoline	10	mM	NGP-001-02	B04	CPD000238142	4723	DB01230	-1.83	NO	0.67	NO	0.99	0.03	NO	NO	-0.78	NO
94	Lamotrigine	10.3	mM	NGP-001-02	B05	CPD000058464	3878	DB00555	-1.57	NO	-0.84	NO	0.64	0.03	NO	NO	-1.72	NO
95	Honokiol	10.1	mM	NGP-001-02	B06	CPD000387107	72303	NA	-27.27	YES	-33.17	YES	0.56	0.04	NO	NO	-1.68	NO
96	Tosufloxacin tosylate	7	mM	NGP-001-02	B07	CPD000469195	93858	NA	-0.39	NO	1.02	NO	1.34	0.06	NO	NO	-2.15	NO
97	Halometasone monohydrate	10	mM	NGP-001-02	B08	CPD000466330	9846332	NA	-0.26	NO	2.32	YES	0.27	0.03	NO	NO	-1.12	NO
98	Tacrolimus	10	mM	NGP-001-02	B09	CPD000466356	23581796	DB00864	11.99	YES	20.93	YES	0.75	0.03	NO	NO	-0.77	NO
99	Secnidazole	10	mM	NGP-001-02	B10	CPD000149359	71815	NA	-0.7	NO	-0.44	NO	0.94	0.03	NO	NO	0.68	NO
100	Oxiconazole nitrate	10	mM	NGP-001-02	B11	CPD000469293	47316	DB00239	66.32	YES	47.87	YES	0.87	0.04	NO	NO	-3.02	NO
101	Ramipril	10	mM	NGP-001-02	C02	CPD000466386	5362129	DB00178	-0.9	NO	2.05	YES	0.92	0.03	NO	NO	-1.04	NO
102	Azelastine hydrochloride	9.1	mM	NGP-001-02	C03	CPD000469183	54360	DB00972	0.19	NO	10.97	YES	0.63	0.03	NO	NO	10.72	YES
103	Letrozol	10	mM	NGP-001-02	C04	CPD000466343	3902	NA	-0.45	NO	20.35	YES	1.08	0.03	NO	NO	-0.01	NO
104	Crotamiton	10.3	mM	NGP-001-02	C05	CPD000059145	688020	DB00265	-0.07	NO	0.99	NO	2.32	0.06	NO	NO	3.54	NO
105	Tolterodine tartrate	6.9	mM	NGP-001-02	C06	CPD000469196	9847786	DB01036	0.36	NO	2.36	YES	1.84	0.07	NO	NO	4.21	NO
106	Mecillinam	10	mM	NGP-001-02	C07	CPD000466361	36273	NA	1.05	NO	-0.02	NO	0.59	0.03	NO	NO	-0.86	NO
107	Triclabendazole	10	mM	NGP-001-02	C08	CPD000466357	50248	NA	167.95	YES	74.85	YES	0.58	0.03	NO	NO	-1.98	NO
108	Valaciclovir hydrochloride	9	mM	NGP-001-02	C09	CPD000469208	60772	DB00577	0.36	NO	-0.28	NO	0.8	0.03	NO	NO	0.04	NO
109	Nifekalant hydrochloride	9.2	mM	NGP-001-02	C10	CPD000466369	122188	NA	-0.07	NO	0.65	NO	0.47	0.03	NO	NO	-0.61	NO
110	Kitasamycin	8.3	mM	NGP-001-02	C11	CPD000469235	23581794	NA	0.36	NO	1.06	NO	-0.32	0.03	NO	NO	-0.89	NO
111	Levofloxacin	10	mM	NGP-001-02	D02	CPD000466387	149096	DB01137	-0.66	NO	5.81	YES	-0.01	0.03	NO	NO	0.16	NO
112	Tocainide	10	mM	NGP-001-02	D03	CPD000466388	38945	DB01056	-0.53	NO	1.11	NO	0.62	0.03	NO	NO	0.7	NO
113	Meropenem	11.4	mM	NGP-001-02	D04	CPD000469184	441130	DB00760	-1.19	NO	0.68	NO	-2.33	0.06	NO	NO	-1.58	NO
114	Amfebutamone hydrochloride	10.1	mM	NGP-001-02	D05	CPD000472526	444	NA	-0.7	NO	0.01	NO	0.84	0.05	NO	NO	-0.33	NO
115	Carmofur	10.3	mM	NGP-001-02	D06	CPD000466363	2577	NA	37.2	YES	22.81	YES	0.49	0.03	NO	NO	-2.78	NO
116	Atomexetine hydrochloride	8.7	mM	NGP-001-02	D07	CPD000469177	54840	NA	0.06	NO	5.57	YES	0.57	0.03	NO	NO	10.09	YES
117	Rofecoxib	10	mM	NGP-001-02	D08	CPD000466331	5090	DB00533	0.04	NO	-0.37	NO	0.79	0.04	NO	NO	-1.67	NO
118	Clarithromycin	10	mM	NGP-001-02	D09	CPD000466382	84029	DB01211	1.37	NO	-1.97	NO	-0.51	0.05	NO	NO	-1.54	NO
119	Nateglinide	10	mM	NGP-001-02	D10	CPD000466372	5311309	DB00731	-0.35	NO	0.63	NO	0.06	0.04	NO	NO	-0.37	NO
120	Famciclovir	10	mM	NGP-001-02	D11	CPD000466375	3324	DB00426	-1.36	NO	-0.2	NO	0.31	0.03	NO	NO	-0.43	NO
121	19-Nortestosterone	10	mM	NGP-001-02	E02	CPD000058610	9904	NA	2.24	YES	5.3	YES	1.91	0.07	NO	NO	1.09	NO
122	Taxifolin	10.1	mM	NGP-001-02	E03	CPD000499525	712318	NA	-1.02	NO	-0.17	NO	-0.02	0.02	NO	NO	-0.52	NO
123	Orlistat	10	mM	NGP-001-02	E04	CPD000466339	3034010	DB01083	0.78	NO	-0.73	NO	-2.33	0.12	NO	NO	-1.52	NO
124	Alfuzosin	10	mM	NGP-001-02	E05	CPD000466340	2092	DB00346	-0.26	NO	-1.12	NO	0.06	0.04	NO	NO	-0.29	NO
125	Methyl paroxetine	9.7	mM	NGP-001-02	E06	CPD000469181	10947895	NA	2.48	YES	35.02	YES	0.37	0.03	NO	NO	10.66	YES
126	Artesunate	10	mM	NGP-001-02	E07	CPD000466336	65664	NA	2.81	YES	23.18	YES	0.74	0.04	NO	NO	0.08	NO
127	Bisoprolol fumarate	8.5	mM	NGP-001-02	E08	CPD000471619	6917733	DB00612	0.65	NO	-0.36	NO	0.16	0.03	NO	NO	-0.11	NO
128	Aripiprazole	10	mM	NGP-001-02	E09	CPD000466383	60795	DB01238	117.24	YES	18.53	YES	-0.09	0.04	NO	NO	-1.42	NO
129	Megestrol acetate	10	mM	NGP-001-02	E10	CPD000058691	11683	DB00351	1.27	NO	38.52	YES	0.75	0.06	NO	NO	-2.67	NO
130	Sotalol hydrochloride	8.8	mM	NGP-001-02	E11	CPD000326828	66245	NA	-1.04	NO	-0.51	NO	-0.03	0.04	NO	NO	-0.43	NO
131	Nizatidine	10	mM	NGP-001-02	F02	CPD000466384	3033637	DB00585	-0.09	NO	-0.22	NO	-0.14	0.03	NO	NO	-0.53	NO
132	Fenpiverinium bromide	10.1	mM	NGP-001-02	F03	CPD000469284	71489	NA	-1.06	NO	-1.25	NO	0.3	0.04	NO	NO	-1.06	NO
133	Ondansetron hcl	8.9	mM	NGP-001-02	F04	CPD000469179	68647	DB00904	-0.22	NO	-1.11	NO	-0.41	0.04	NO	NO	-0.73	NO
134	Amisulpride	10	mM	NGP-001-02	F05	CPD000449309	2159	DB06288	-0.22	NO	-0.73	NO	-0.38	0.03	NO	NO	-0.66	NO
135	Olmesartan medoxomil	10	mM	NGP-001-02	F06	CPD000466337	158781	DB00275	-0.15	NO	0.53	NO	-0.05	0.03	NO	NO	-2.52	NO
136	Itraconazole	10.1	mM	NGP-001-02	F07	CPD000058959	3793	DB01167	10.87	YES	21.42	YES	0.16	0.03	NO	NO	-1.94	NO
137	Ezetimibe	10	mM	NGP-001-02	F08	CPD000466334	150311	DB00973	-0.7	NO	-33.17	YES	-0.54	0.08	NO	NO	-0.94	NO
138	Trimebutine maleate	7.7	mM	NGP-001-02	F09	CPD000471622	5388977	NA	0.59	NO	3.33	YES	0.35	0.03	NO	NO	-1.28	NO
139	Ormetoprim	10	mM	NGP-001-02	F10	CPD000466374	23418	NA	-1.06	NO	-2.46	YES	0.05	0.04	NO	NO	-0.05	NO
140	Rufloxacin hydrochloride	10	mM	NGP-001-02	F11	CPD000466373	58258	NA	-0.18	NO	17.36	YES	-0.17	0.04	NO	NO	-0.04	NO
141	5-Fluorocytosine	10.5	mM	NGP-001-02	G02	CPD000059047	3366	NA	54.47	YES	36.6	YES	0.12	0.03	NO	NO	-1.29	NO
142	Seapuron	8.6	mM	NGP-001-02	G03	CPD000469182	6410757	NA	-0.6	NO	-1.14	NO	-5.26	0.07	NO	YES	0.57	NO
143	Levonorgestrel	10	mM	NGP-001-02	G04	CPD000059117	13109	DB00367	0.89	NO	-0.41	NO	0.19	0.03	NO	NO	-2.79	NO
144	Lofepramine	10	mM	NGP-001-02	G05	CPD000469292	33611	NA	3.15	YES	51.93	YES	-7.46	0.29	NO	YES	3.17	NO
145	Losartan potassium	9.2	mM	NGP-001-02	G06	CPD000469593	60771	DB00678	-0.26	NO	-1.21	NO	-0.41	0.03	NO	NO	-1.2	NO
146	Cefpodoxime proxetil	7.7	mM	NGP-001-02	G07	CPD000469193	441393	DB01416	-1.13	NO	-0.15	NO	-0.83	0.05	NO	NO	-1.5	NO
147	Tiagabine hydrochloride	9.1	mM	NGP-001-02	G08	CPD000469176	91274	DB00906	0.29	NO	0.07	NO	2.44	0.1	NO	NO	5.07	YES
148	Mestanolone	10.1	mM	NGP-001-02	G09	CPD000238198	10633	NA	-0.15	NO	2.2	YES	0.79	0.05	NO	NO	-0.62	NO
149	Zileuton	10	mM	NGP-001-02	G10	CPD000466377	60490	DB00744	-0.81	NO	0.45	NO	-0.22	0.04	NO	NO	-2.31	NO
150	Taxifolin	10	mM	NGP-001-02	G11	CPD000466389	439533	NA	-0.85	NO	-0.46	NO	-0.07	0.03	NO	NO	-0.97	NO
151	Trileptal	10	mM	NGP-001-02	H02	CPD000048684	34312	NA	1.24	NO	1.04	NO	-23.31	0.81	NO	YES	-2.89	NO
152	Idebenone	10.2	mM	NGP-001-02	H03	CPD000466364	3686	NA	15.55	YES	-33.17	YES	0.12	0.03	NO	NO	-0.57	NO
153	Cetraxate hydrochloride	9	mM	NGP-001-02	H04	CPD000469197	34001	NA	1.25	NO	-0.24	NO	-0.06	0.04	NO	NO	-0.39	NO
154	Perospirone hydrochloride	9.4	mM	NGP-001-02	H05	CPD000466362	115367	NA	3.13	YES	2.19	YES	2.69	0.1	NO	NO	-2.62	NO
155	Temozolomide	10	mM	NGP-001-02	H06	CPD000466338	5394	DB00853	1.92	NO	-0.09	NO	-0.1	0.04	NO	NO	-0.54	NO
156	Buflomedil hydrochloride	8.9	mM	NGP-001-02	H07	CPD000058803	6420013	NA	2.01	YES	0.38	NO	-0.24	0.04	NO	NO	-1.08	NO
157	Idarubicin hydrochloride	9.3	mM	NGP-001-02	H08	CPD000466355	636362	DB01177	127.75	YES	174.12	YES	-0.06	0.04	NO	NO	-2.94	NO
158	Nisoldipine	10	mM	NGP-001-02	H09	CPD000466370	4499	DB00401	57.04	YES	89.15	YES	-0.05	0.04	NO	NO	-2.61	NO
159	Stavudine	10	mM	NGP-001-02	H10	CPD000058350	18283	DB00649	0.1	NO	0.68	NO	-1.16	0.03	NO	NO	-1.75	NO
160	Alosetron hydrochloride	8.9	mM	NGP-001-02	H11	CPD000469211	60758	DB00969	3.01	YES	-0.69	NO	-0.89	0.04	NO	NO	-3.51	NO
161	Bupropion hydrochloride	8.7	mM	NGP-001-03	A02	CPD000058423	62884	DB01156	-0.87	NO	-0.08	NO	3.2	0.07	NO	NO	1.07	NO
162	Pazufloxacin	10	mM	NGP-001-03	A03	CPD000466380	65957	NA	-1.05	NO	0.07	NO	0.17	0.04	NO	NO	-0.93	NO
163	Topotecan hydrochloride	9.2	mM	NGP-001-03	A04	CPD000466344	60699	DB01030	-1.34	NO	4.71	YES	NA	NA	NO	NO	0.22	NO
164	Naftopidil	10	mM	NGP-001-03	A05	CPD000466346	4418	NA	7.62	YES	-38.75	YES	9.59	0.31	YES	NO	5.23	YES
165	Rosiglitazone maleate	7.6	mM	NGP-001-03	A06	CPD000471612	5281055	DB00412	1.82	NO	2.19	YES	1.38	0.06	NO	NO	0.95	NO
166	Bicalutamide	10	mM	NGP-001-03	A07	CPD000466329	2375	DB01128	0.66	NO	20.82	YES	0.41	0.04	NO	NO	-0.62	NO
167	Ftorafur	10	mM	NGP-001-03	A08	CPD000059106	5386	NA	0.14	NO	-0.92	NO	0.02	0.03	NO	NO	0.93	NO
168	Isoquercetrin	10	mM	NGP-001-03	A09	CPD000466391	5280804	NA	0.03	NO	-0.6	NO	-1.49	0.04	NO	NO	-0.48	NO
169	Doxorubicin hydrochloride	9.4	mM	NGP-001-03	A10	CPD000058570	443939	DB00997	50.98	YES	83.6	YES	0.3	0.04	NO	NO	-0.73	NO
170	Midazolam hydrochloride	9	mM	NGP-001-03	A11	CPD000469160	43032	DB00683	0.95	NO	12.05	YES	6.54	0.12	YES	NO	4.65	NO
171	Irsogladine maleate	6.9	mM	NGP-001-03	B02	CPD000471621	5282435	NA	-1.26	NO	-0.44	NO	0.91	0.03	NO	NO	-0.77	NO
172	Miglitol	10	mM	NGP-001-03	B03	CPD000466381	441314	DB00491	-1.34	NO	-2.16	YES	1.46	0.03	NO	NO	-0.62	NO
173	Levetiracetam	10.1	mM	NGP-001-03	B04	CPD000466303	5284583	DB01202	-1.26	NO	-2.51	YES	1.7	0.04	NO	NO	-0.77	NO
174	Nobiletin	10	mM	NGP-001-03	B05	CPD000156231	72344	NA	4.43	YES	3.87	YES	5.43	0.1	NO	NO	1.02	NO
175	Escitalopram oxalate	7.9	mM	NGP-001-03	B06	CPD000469191	146571	DB01175	0.93	NO	-1.47	NO	0.99	0.04	NO	NO	6.6	YES
176	Benidipine hydrochloride	6	mM	NGP-001-03	B07	CPD000469192	656667	NA	1.95	NO	-3.4	YES	4.32	0.08	NO	NO	-1.2	NO
177	Oligomycin c	10	mM	NGP-001-03	B08	CPD000466392	93857	NA	1.53	NO	0.66	NO	-1.43	0.06	NO	NO	0.21	NO
178	Flumazenil	10	mM	NGP-001-03	B09	CPD000058450	3373	DB01205	1.4	NO	-0.24	NO	1.01	0.03	NO	NO	-0.81	NO
179	Moxonidine hydrochloride	9.2	mM	NGP-001-03	B10	CPD000469209	11231255	NA	0.19	NO	-1.22	NO	0.6	0.03	NO	NO	-0.58	NO
180	Lamivudine	9.9	mM	NGP-001-03	B11	CPD000466319	60825	DB00709	-0.39	NO	-1.68	NO	1.14	0.04	NO	NO	-0.4	NO
181	Acarbose	10	mM	NGP-001-03	C02	CPD000466376	41774	DB00284	-1.13	NO	-2.1	YES	0.28	0.04	NO	NO	-0.56	NO
182	Tranilast	10	mM	NGP-001-03	C03	CPD000058373	5282230	NA	-0.6	NO	-1.78	NO	0.24	0.03	NO	NO	0.1	NO
183	Pramipexole hydrochloride	7.1	mM	NGP-001-03	C04	CPD000469142	9964861	DB00413	-0.39	NO	-2.17	YES	-0.08	0.04	NO	NO	-0.03	NO
184	Finasteride	10	mM	NGP-001-03	C05	CPD000466304	57363	DB01216	1.37	NO	20.21	YES	3.51	0.08	NO	NO	3.09	NO
185	Zeranol	10	mM	NGP-001-03	C06	CPD000058866	216284	NA	1.77	NO	18.31	YES	-2.75	0.06	NO	NO	-1.27	NO
186	Amlexanox	10	mM	NGP-001-03	C07	CPD000466352	2161	DB01025	1.8	NO	0.42	NO	-0.73	0.03	NO	NO	0.07	NO
187	Benazepril hydrochloride	9.2	mM	NGP-001-03	C08	CPD000469199	5362123	DB00542	1.72	NO	1.33	NO	-1.49	0.04	NO	NO	0.2	NO
188	Ozagrel hydrochloride	8.6	mM	NGP-001-03	C09	CPD000469164	6438130	NA	2.72	YES	0.64	NO	0.27	0.04	NO	NO	0.54	NO
189	Nitrazepam	10	mM	NGP-001-03	C10	CPD000058302	4506	DB01595	2.01	YES	8.16	YES	-0.69	0.03	NO	NO	-0.13	NO
190	Procarbazine hydrochloride	8.6	mM	NGP-001-03	C11	CPD000469151	9703	DB01168	0.69	NO	-0.84	NO	-0.1	0.03	NO	NO	-1.19	NO
191	Benproperine phosphate	10	mM	NGP-001-03	D02	CPD000469294	167811	NA	6.41	YES	3.29	YES	0.55	0.04	NO	NO	7.79	YES
192	Olanzapine	9.9	mM	NGP-001-03	D03	CPD000466345	4585	DB00334	-0.76	NO	-0.74	NO	2.56	0.06	NO	NO	1.61	NO
193	Risperidone	10	mM	NGP-001-03	D04	CPD000466323	5073	DB00734	-0.68	NO	-2.71	YES	-0.4	0.05	NO	NO	1.75	NO
194	Zolpidem tartrate	19.9	mM	NGP-001-03	D05	CPD000469145	18004026	DB00425	-0.6	NO	-1.48	NO	1.79	0.1	NO	NO	0.04	NO
195	Latanoprost	10.3	mM	NGP-001-03	D06	CPD000466354	5311221	DB00654	0.43	NO	125.3	YES	8.85	0.27	YES	NO	0.65	NO
196	Cerivastatin	10	mM	NGP-001-03	D07	CPD000469148	5281100	DB00439	28.61	YES	74.61	YES	0.79	0.03	NO	NO	0.17	NO
197	Oxymetholone	10.1	mM	NGP-001-03	D08	CPD000058877	3032303	NA	9.13	YES	-38.75	YES	1.28	0.04	NO	NO	8.48	YES
198	Hyperoside	8.8	mM	NGP-001-03	D09	CPD000466394	5281643	NA	-0.31	NO	0.09	NO	0.06	0.03	NO	NO	0.06	NO
199	Pefloxacin mesylate	7.9	mM	NGP-001-03	D10	CPD000387024	119525	DB00487	-1.1	NO	3.65	YES	-0.85	0.04	NO	NO	0.48	NO
200	Esomeprazole mg	4.8	mM	NGP-001-03	D11	CPD000469280	5311083	DB00736	0.69	NO	-2.89	YES	3.2	0.04	NO	NO	0.32	NO
201	Phenprobamate	10.1	mM	NGP-001-03	E02	CPD000466378	4770	NA	0.48	NO	-0.54	NO	-0.41	0.03	NO	NO	0.5	NO
202	Nefazodone	9.3	mM	NGP-001-03	E03	CPD000449297	54911	DB01149	9.68	YES	-38.75	YES	5.84	0.33	YES	NO	3	NO
203	Pioglitazone hydrochloride	9.1	mM	NGP-001-03	E04	CPD000469167	60560	DB01132	-0.08	NO	-1.03	NO	2.87	0.05	NO	NO	0.36	NO
204	Viramune	10	mM	NGP-001-03	E05	CPD000048458	4463	NA	-1.29	NO	-1.4	NO	-3.55	0.05	NO	NO	0.21	NO
205	Didanosine	10.1	mM	NGP-001-03	E06	CPD000058576	50599	NA	-1.9	NO	-1.72	NO	-0.63	0.03	NO	NO	0.35	NO
206	Icariin	10	mM	NGP-001-03	E07	CPD000466309	5318997	NA	-1.71	NO	-1.24	NO	-1.61	0.06	NO	NO	0.32	NO
207	Ipriflavone	10	mM	NGP-001-03	E08	CPD000059060	3747	NA	-0.15	NO	3.44	YES	-1.58	0.07	NO	NO	-1.16	NO
208	Rifabutin	10	mM	NGP-001-03	E09	CPD000466322	5361912	DB00615	0.72	NO	1.43	NO	6	0.07	NO	NO	-1.4	NO
209	Venlafaxine hydrochloride	8.9	mM	NGP-001-03	E10	CPD000469154	62923	DB00285	-0.63	NO	-1.06	NO	-0.02	0.04	NO	NO	1	NO
210	Sulfasalazine	10	mM	NGP-001-03	E11	CPD000059146	5353980	DB00795	-2.26	YES	-2.95	YES	2.13	0.03	NO	NO	-0.54	NO
211	Memantine hydrochloride	8.3	mM	NGP-001-03	F02	CPD000058926	11229655	DB01043	-0.66	NO	-0.36	NO	2.32	0.06	NO	NO	1.61	NO
212	Moxifloxacin hydrochloride	9.2	mM	NGP-001-03	F03	CPD000469185	101526	DB00218	0.08	NO	22.45	YES	2.59	0.09	NO	NO	0.8	NO
213	Cilastatin	9.4	mM	NGP-001-03	F04	CPD000469147	6917946	DB01597	-0.97	NO	-1.86	NO	-1.2	0.04	NO	NO	-0.68	NO
214	Topiramate	10	mM	NGP-001-03	F05	CPD000466325	5284627	DB00273	-1.18	NO	-0.81	NO	-1.32	0.04	NO	NO	0.22	NO
215	Sertraline	9	mM	NGP-001-03	F06	CPD000466298	63009	DB01104	-43.51	YES	-38.75	YES	-0.26	0.03	NO	NO	-0.61	NO
216	Methylandrostenediol	10.1	mM	NGP-001-03	F07	CPD000466310	229021	NA	0.35	NO	15.07	YES	0.44	0.04	NO	NO	-1.02	NO
217	Oxaprozin	10	mM	NGP-001-03	F08	CPD000058286	4614	DB00991	0.61	NO	5.72	YES	-0.84	0.03	NO	NO	-0.23	NO
218	Esmolol hydrochloride	9	mM	NGP-001-03	F09	CPD000469141	104769	DB00187	-0.5	NO	-2.29	YES	0.86	0.04	NO	NO	0.23	NO
219	Pantoprazole sodium	10	mM	NGP-001-03	F10	CPD000469592	6918157	DB00213	-0.44	NO	-2.1	YES	0.75	0.03	NO	NO	0.54	NO
220	Torasemide	9.9	mM	NGP-001-03	F11	CPD000466313	41781	DB00214	-0.66	NO	-2.4	YES	-0.45	0.03	NO	NO	0.74	NO
221	Carvedilol	10	mM	NGP-001-03	G02	CPD000449280	2585	DB01136	0.43	NO	50.66	YES	-0.9	0.14	NO	NO	0.66	NO
222	Nelfinavir mesylate	8.6	mM	NGP-001-03	G03	CPD000469186	64142	DB00220	0.56	NO	16.21	YES	4.48	0.12	NO	NO	0.21	NO
223	Argatroban	10.1	mM	NGP-001-03	G04	CPD000466348	92722	DB00278	-0.6	NO	-2.07	YES	-1.04	0.04	NO	NO	0.32	NO
224	Voriconazole	9.9	mM	NGP-001-03	G05	CPD000466350	71616	DB00582	43.33	YES	20.32	YES	-0.46	0.03	NO	NO	0.14	NO
225	Calcipotriol	10.1	mM	NGP-001-03	G06	CPD000466353	5288783	DB02300	-0.31	NO	-38.75	YES	-7.5	0.06	NO	YES	2.61	NO
226	Triptolide	10	mM	NGP-001-03	G07	CPD000466307	107985	NA	-0.92	NO	-2.17	YES	-1.02	0.03	NO	NO	0.28	NO
227	Rolipram	10	mM	NGP-001-03	G08	CPD000058510	5092	NA	-0.71	NO	-1.05	NO	-2.81	0.05	NO	NO	-0.47	NO
228	Tadalafil	10	mM	NGP-001-03	G09	CPD000466321	110635	DB00820	-1.71	NO	-2.54	YES	-4.01	0.03	NO	NO	-0.28	NO
229	Fluticasone propionate	10	mM	NGP-001-03	G10	CPD000469159	444036	NA	-0.58	NO	-1.65	NO	-2.57	0.03	NO	NO	-1.24	NO
230	Tropisetron hydrochloride	7.7	mM	NGP-001-03	G11	CPD000469156	656664	NA	-0.89	NO	-2.07	YES	1.1	0.05	NO	NO	0.82	NO
231	Lomifylline	10	mM	NGP-001-03	H02	CPD000466379	65599	NA	0.79	NO	-0.96	NO	-2.21	0.04	NO	NO	-1.26	NO
232	Pravastatin sodium	9.5	mM	NGP-001-03	H03	CPD000469187	54692	DB00175	0.4	NO	13.59	YES	-1.3	0.03	NO	NO	-0.46	NO
233	Valdecoxib	10	mM	NGP-001-03	H04	CPD000466327	119607	DB00580	0.72	NO	10.99	YES	-1.13	0.03	NO	NO	-1.51	NO
234	Fenoldopam mesylate	7.7	mM	NGP-001-03	H05	CPD000469190	49659	DB00800	-0.74	NO	-1.09	NO	-0.81	0.03	NO	NO	-0.24	NO
235	Epirubicin hydrochloride	9.4	mM	NGP-001-03	H06	CPD000466308	65348	DB00445	11.76	YES	93.89	YES	-0.4	0.04	NO	NO	-1.39	NO
236	Rosigltazone hydrochloride	8.2	mM	NGP-001-03	H07	CPD000469170	9865387	NA	2.48	YES	0.66	NO	-0.4	0.04	NO	NO	2.69	NO
237	Mosapride citrate	6.9	mM	NGP-001-03	H08	CPD000469200	119583	NA	3.25	YES	17.16	YES	1.67	0.08	NO	NO	-0.43	NO
238	Modafinil	10	mM	NGP-001-03	H09	CPD000058957	4236	DB00745	-1.13	NO	-1.24	NO	-0.48	0.03	NO	NO	-0.33	NO
239	Indinavir sulphate	8.6	mM	NGP-001-03	H10	CPD000469161	5462355	DB00224	0	NO	-2.58	YES	-1.29	0.03	NO	NO	-1.36	NO
240	Ranolazine dihydrochloride	8.6	mM	NGP-001-03	H11	CPD000326795	23581790	DB00243	-0.31	NO	-1.41	NO	-1.05	0.04	NO	NO	-1.05	NO
241	Nitrendipine	10	mM	NGP-001-04	A02	CPD000058366	4507	DB01054	1.09	NO	23.13	YES	10.3	0.2	YES	NO	1.41	NO
242	Rutin	10	mM	NGP-001-04	A03	CPD000112560	5280805	DB01698	-2.67	YES	0.28	NO	-0.59	0.04	NO	NO	-1.04	NO
243	Ritonavir	10	mM	NGP-001-04	A04	CPD000466395	392622	DB00503	-0.97	NO	8.8	YES	-0.68	0.05	NO	NO	-1.41	NO
244	Pterostilbene	10	mM	NGP-001-04	A05	CPD000440694	5281727	NA	-43.16	YES	-29.85	YES	-2.39	0.03	NO	NO	-0.31	NO
245	Ticlopidine hydrochloride	8.7	mM	NGP-001-04	A06	CPD000048468	65335	DB00208	0.36	NO	1.32	NO	2.24	0.13	NO	NO	-0.1	NO
246	Physostigmine	10	mM	NGP-001-04	A07	CPD000449286	23581807	DB00981	-1.51	NO	-0.52	NO	0.21	0.06	NO	NO	-0.16	NO
247	Rizatriptan benzoate	10	mM	NGP-001-04	A08	CPD000525252	5078	DB00953	-0.18	NO	-1.17	NO	-0.91	0.04	NO	NO	-0.35	NO
248	Itopride hydrochloride	8.2	mM	NGP-001-04	A09	CPD000469143	129791	NA	-0.67	NO	-1.3	NO	-0.55	0.04	NO	NO	-1.08	NO
249	Remacemide	10	mM	NGP-001-04	A10	CPD000466281	60510	NA	-0.78	NO	4.61	YES	2.76	0.06	NO	NO	-1.04	NO
250	2-Chloroadenosine	10	mM	NGP-001-04	A11	CPD000058612	8974	NA	-1.07	NO	-1.1	NO	-0.44	0.04	NO	NO	-0.54	NO
251	Saquinavir mesylate	8.8	mM	NGP-001-04	B02	CPD000469290	60934	DB01232	2.5	YES	-2.2	YES	-0.34	0.04	NO	NO	-1.67	NO
252	Penciclovir	10	mM	NGP-001-04	B03	CPD000466317	4725	DB00299	-0.88	NO	-0.22	NO	0.81	0.04	NO	NO	-0.35	NO
253	Vinorelbine bitatrate	7.2	mM	NGP-001-04	B04	CPD000469210	23581803	DB00361	-1.83	NO	-3.29	YES	1.77	0.05	NO	NO	-0.36	NO
254	Roxatidine acetate hydrochloride	9.1	mM	NGP-001-04	B05	CPD000469144	56704	NA	-1.51	NO	-0.42	NO	0.57	0.04	NO	NO	-1.59	NO
255	Loxoprofen sodium	9.1	mM	NGP-001-04	B06	CPD000469165	6917990	NA	-0.61	NO	-0.52	NO	-0.04	0.05	NO	NO	-0.15	NO
256	Lobeline hydrochloride	10	mM	NGP-001-04	B07	CPD000058465	101615	NA	0.72	NO	-1.96	NO	2.99	0.07	NO	NO	0.57	NO
257	Rifapentine	10	mM	NGP-001-04	B08	CPD000466332	23581793	DB01201	0.15	NO	-0.99	NO	14.16	0.09	NO	NO	-0.69	NO
258	Rifaximin	10	mM	NGP-001-04	B09	CPD000466324	72111	DB01220	-1.64	NO	-1.56	NO	4.99	0.04	NO	NO	-0.87	NO
259	Altanserin	10	mM	NGP-001-04	B10	CPD000466283	23581819	NA	-0.21	NO	-0.28	NO	2.43	0.05	NO	NO	-0.6	NO
260	Ornidazole	10	mM	NGP-001-04	B11	CPD000058726	28061	NA	-2.78	YES	-0.62	NO	-0.66	0.04	NO	NO	-0.66	NO
261	Bifonazole	10	mM	NGP-001-04	C02	CPD000058970	2378	DB04794	-43.16	YES	-29.85	YES	0.04	0.04	NO	NO	-0.93	NO
262	Calcitriol	10	mM	NGP-001-04	C03	CPD000466393	5280453	DB00136	-0.32	NO	21.1	YES	3.05	0.08	NO	NO	2.18	NO
263	Linezolide	10	mM	NGP-001-04	C04	CPD000466335	441401	NA	-1.67	NO	2.05	YES	0.79	0.04	NO	NO	-0.83	NO
264	Dexbrompheniramine maleate	7.3	mM	NGP-001-04	C05	CPD000471616	6433334	DB00405	-1.48	NO	-0.16	NO	-1.63	0.04	NO	NO	7.19	YES
265	Zafirlukast	10	mM	NGP-001-04	C06	CPD000466316	5717	DB00549	-1.75	NO	40.9	YES	0.72	0.08	NO	NO	1	NO
266	Doxylamine succinate	10	mM	NGP-001-04	C07	CPD000058436	11224	DB00366	1.39	NO	-0.68	NO	-0.3	0.03	NO	NO	1.01	NO
267	Loteprednol etabonate	10	mM	NGP-001-04	C08	CPD000469178	444025	NA	0.91	NO	5.74	YES	0	0.04	NO	NO	-0.2	NO
268	Montelukast	9.6	mM	NGP-001-04	C09	CPD000469188	5281041	DB00471	-1.05	NO	0.91	NO	-5.64	0.28	NO	YES	0.61	NO
269	Betaxolol hydrochloride	10	mM	NGP-001-04	C10	CPD000058420	107952	DB00195	0.42	NO	-0.35	NO	7.8	0.14	YES	NO	-0.58	NO
270	Dimethylphenylpiperazinium Iodide	10	mM	NGP-001-04	C11	CPD000058572	5911	NA	-0.67	NO	-0.59	NO	-0.6	0.04	NO	NO	-0.3	NO
271	Sumatriptan succinate	7.2	mM	NGP-001-04	D02	CPD000469158	59772	DB00669	-1.56	NO	0.45	NO	-0.43	0.03	NO	NO	-0.69	NO
272	Diphenoxylate	8.6	mM	NGP-001-04	D03	CPD000469140	6432394	DB01081	-0.94	NO	5.75	YES	1.47	0.08	NO	NO	0.41	NO
273	Lomerizine dihydrochloride	8.7	mM	NGP-001-04	D04	CPD000469203	13579832	NA	2.29	YES	-29.85	YES	13.1	0.24	YES	NO	-0.52	NO
274	Anagrelide hydrochloride	8.8	mM	NGP-001-04	D05	CPD000469168	42786	DB00261	-2.21	YES	-1.22	NO	3.77	0.06	NO	NO	-0.8	NO
275	Terbinafine hydrochloride	8.9	mM	NGP-001-04	D06	CPD000469152	5282481	DB00857	93.78	YES	30.08	YES	-2.07	0.04	NO	NO	-0.72	NO
276	Milnacipran	10	mM	NGP-001-04	D07	CPD000449266	163701	DB04896	-0.02	NO	-0.1	NO	2.47	0.04	NO	NO	-0.19	NO
277	Enalaprilat	10	mM	NGP-001-04	D08	CPD000466359	5462501	NA	0.34	NO	-0.82	NO	1.04	0.04	NO	NO	-0.11	NO
278	Zalcitabine	10	mM	NGP-001-04	D09	CPD000058253	24066	NA	-1.35	NO	-0.86	NO	1.61	0.04	NO	NO	-0.41	NO
279	Indarubicin	10	mM	NGP-001-04	D10	CPD000466311	5359405	NA	-1.62	NO	-1.23	NO	9.61	0.04	NO	NO	-1.36	NO
280	Pirenperone	10	mM	NGP-001-04	D11	CPD000058507	4847	NA	-0.59	NO	-0.84	NO	13.55	0.3	YES	NO	2.21	NO
281	Exemestane	10	mM	NGP-001-04	E02	CPD000466314	60198	DB00990	0.77	NO	4.58	YES	7.73	0.11	YES	NO	3.99	NO
282	Felbamate	14	mM	NGP-001-04	E03	CPD000449307	23581812	DB00949	-0.94	NO	-0.62	NO	-0.27	0.04	NO	NO	-0.45	NO
283	Efavirenz	10.1	mM	NGP-001-04	E04	CPD000466351	64139	DB00625	40.5	YES	-29.85	YES	-2.28	0.05	NO	NO	-0.43	NO
284	Tegaserod maleate	7.2	mM	NGP-001-04	E05	CPD000471618	6918369	DB01079	-43.16	YES	-29.85	YES	-3.28	0.05	NO	NO	-0.84	NO
285	Isradipine	9.9	mM	NGP-001-04	E06	CPD000466320	3784	DB00270	0.93	NO	136.66	YES	1.45	0.1	NO	NO	5.46	YES
286	5-Fluoro-2-Pyrimidone	10	mM	NGP-001-04	E07	CPD000449315	101498	NA	-2.08	YES	-0.92	NO	0.54	0.04	NO	NO	-0.02	NO
287	Donepezil	9.1	mM	NGP-001-04	E08	CPD000449292	5741	DB00843	2.75	YES	3.1	YES	4.44	0.1	NO	NO	0.42	NO
288	Clonidine	10	mM	NGP-001-04	E09	CPD000466276	20179	NA	-1.97	NO	-1.44	NO	-1.29	0.05	NO	NO	-0.25	NO
289	Azasetron	10	mM	NGP-001-04	E10	CPD000466285	115000	NA	-0.56	NO	-0.58	NO	-5.35	0.11	NO	YES	1.08	NO
290	Mestranol	10	mM	NGP-001-04	E11	CPD000059128	6291	DB01357	0.8	NO	3.53	YES	4.85	0.08	NO	NO	-0.79	NO
291	Nitazoxanide	10	mM	NGP-001-04	F02	CPD000466367	41684	DB00507	1.77	NO	0.16	NO	7.92	0.17	YES	NO	6.54	YES
292	Droperidol	10	mM	NGP-001-04	F03	CPD000058855	3168	DB00450	-0.99	NO	-1.57	NO	3.12	0.09	NO	NO	-0.15	NO
293	Irbesartan	10.1	mM	NGP-001-04	F04	CPD000466306	3749	DB01029	-0.72	NO	-0.82	NO	-0.17	0.03	NO	NO	-0.26	NO
294	Milrinone	10.1	mM	NGP-001-04	F05	CPD000058475	4197	DB00235	-0.97	NO	-2.83	YES	-1.34	0.03	NO	NO	-0.23	NO
295	Valsartan	10	mM	NGP-001-04	F06	CPD000466318	60846	DB00177	-1.05	NO	-1.81	NO	0.42	0.04	NO	NO	-0.5	NO
296	Chlorpheniramine	10	mM	NGP-001-04	F07	CPD000466271	5281068	DB01114	-0.56	NO	-0.6	NO	-1.3	0.04	NO	NO	5.73	YES
297	Nimetazepam	10	mM	NGP-001-04	F08	CPD000238177	4496	NA	-0.45	NO	0.79	NO	-0.53	0.04	NO	NO	-0.26	NO
298	Otenzepad	10	mM	NGP-001-04	F09	CPD000466280	107867	NA	-2.57	YES	-1.89	NO	0.65	0.03	NO	NO	-0.63	NO
299	GR 89696	10	mM	NGP-001-04	F10	CPD000466287	6442840	NA	-1.35	NO	-1.16	NO	3.34	0.09	NO	NO	-0.89	NO
300	2-(2-aminoethyl)pyridine	10	mM	NGP-001-04	F11	CPD000059100	75919	NA	-1.35	NO	-0.62	NO	-1.07	0.04	NO	NO	-0.1	NO
301	Diazepam	10	mM	NGP-001-04	G02	CPD000058398	3016	DB00829	2.97	YES	5.55	YES	4.97	0.07	NO	NO	2.18	NO
302	Pentoxifylline	10	mM	NGP-001-04	G03	CPD000035998	4740	DB00806	-0.51	NO	-1.09	NO	0.09	0.03	NO	NO	-0.42	NO
303	Repaglinide	10	mM	NGP-001-04	G04	CPD000466305	65981	DB00912	2.53	YES	-29.85	YES	2	0.07	NO	NO	0.84	NO
304	Levocetirizine	10.7	mM	NGP-001-04	G05	CPD000466315	1549000	NA	-0.8	NO	-1.54	NO	-2.92	0.04	NO	NO	-0.24	NO
305	Piroxicam	10	mM	NGP-001-04	G06	CPD000449291	22723678	DB00554	0.09	NO	0.98	NO	-3.86	0.05	NO	NO	0.11	NO
306	Dofetilide	10	mM	NGP-001-04	G07	CPD000466333	71329	DB00204	-2.19	YES	-1.59	NO	-0.99	0.03	NO	NO	0.07	NO
307	Nicorandil	10	mM	NGP-001-04	G08	CPD000466365	47528	NA	-2.59	YES	-1.47	NO	-0.11	0.04	NO	NO	0.03	NO
308	Tocris-1311	10	mM	NGP-001-04	G09	CPD000466278	3651377	NA	-0.4	NO	6.29	YES	11.15	0.22	YES	NO	-0.42	NO
309	CPD000058773	10	mM	NGP-001-04	G10	CPD000058773	443929	NA	-0.61	NO	-0.63	NO	-0.32	0.03	NO	NO	-0.86	NO
310	Benactyzine hydrochloride	10	mM	NGP-001-04	G11	CPD000059142	66448	NA	-0.83	NO	-0.44	NO	0.09	0.04	NO	NO	-0.53	NO
311	Quetiapine hemifumarate	7.7	mM	NGP-001-04	H02	CPD000471623	6918224	DB01224	1.12	NO	0.31	NO	9.6	0.17	YES	NO	5.3	YES
312	Toradol	6.8	mM	NGP-001-04	H03	CPD000058461	84003	NA	0.91	NO	0.21	NO	-1.05	0.13	NO	NO	-1.15	NO
313	Ethylestrenol	10	mM	NGP-001-04	H04	CPD000238204	13765	DB01493	2.86	YES	93.93	YES	8.75	0.17	YES	NO	1.02	NO
314	Citalopram hydrobromide	7.9	mM	NGP-001-04	H05	CPD000326936	77995	DB00215	-0.04	NO	0.63	NO	-1.83	0.04	NO	NO	7.31	YES
315	Glycopyrrolate	10	mM	NGP-001-04	H06	CPD000469282	11693	DB00986	-0.04	NO	-0.14	NO	1.55	0.07	NO	NO	-0.65	NO
316	Formoterol fumarate dihydrate	7	mM	NGP-001-04	H07	CPD000471620	23581795	DB00983	-0.1	NO	-0.7	NO	0.41	0.09	NO	NO	-1.68	NO
317	Telmisartan	10	mM	NGP-001-04	H08	CPD000466326	65999	DB00966	85.67	YES	43.71	YES	-1.44	0.03	NO	NO	-1.16	NO
318	Etomidate	10.1	mM	NGP-001-04	H09	CPD000466277	667484	NA	2.21	YES	7.78	YES	6.33	0.13	YES	NO	1.04	NO
319	Diazoxide	10	mM	NGP-001-04	H10	CPD000058392	3019	DB01119	-0.72	NO	0.08	NO	3.2	0.07	NO	NO	-1.19	NO
320	Dichloroacetic acid	10	mM	NGP-001-04	H11	CPD000059158	6597	NA	-0.8	NO	0.15	NO	1.21	0.07	NO	NO	-0.62	NO
321	Bestatin	10	mM	NGP-001-05	A02	CPD000059165	72172	DB03424	-1.14	NO	-1.24	NO	-0.06	0.03	NO	NO	-1.06	NO
322	Tryptoline	10	mM	NGP-001-05	A03	CPD000059115	107838	NA	-1.07	NO	-1.27	NO	11.65	0.18	YES	NO	-3.38	NO
323	Mepirizole	10	mM	NGP-001-05	A04	CPD000058715	3242	NA	-1.02	NO	-0.94	NO	-1.87	0.02	NO	NO	-1.87	NO
324	Homoveratrylamine	10	mM	NGP-001-05	A05	CPD000112358	8421	NA	-1.07	NO	-1.46	NO	-0.12	0.02	NO	NO	-1.74	NO
325	Dehydrocholic acid	10	mM	NGP-001-05	A06	CPD000058603	6674	NA	-0.69	NO	-1.13	NO	0.09	0.02	NO	NO	-0.93	NO
326	Medroxyprogesterone	10	mM	NGP-001-05	A07	CPD000058769	10631	DB00603	-0.01	NO	4.15	YES	-0.44	0.03	NO	NO	0.24	NO
327	Nafadotride	10	mM	NGP-001-05	A08	CPD000466292	3408722	NA	-0.11	NO	-2.8	YES	3.66	0.12	NO	NO	-0.64	NO
328	MLS000758940	9.9	mM	NGP-001-05	A09	CPD000466291	10433231	NA	-0.44	NO	-1.81	NO	-0.99	0.03	NO	NO	-3.32	NO
329	Tramadol	10	mM	NGP-001-05	A10	CPD000449308	63013	DB00193	-0.39	NO	-0.93	NO	0.06	0.03	NO	NO	-2.65	NO
330	Cortisone	10	mM	NGP-001-05	A11	CPD000058334	222786	NA	-0.57	NO	0.78	NO	2.53	0.02	NO	NO	-0.95	NO
331	Toremifene citrate	10	mM	NGP-001-05	B02	CPD000469213	3005572	DB00539	-39.38	YES	-39.41	YES	-6.46	0.26	NO	YES	3.57	NO
332	Fluphenazine hydrochloride	10	mM	NGP-001-05	B03	CPD000058411	6602611	DB00623	-39.38	YES	-39.41	YES	-0.3	0.21	NO	NO	7.55	YES
333	6-Azauridine	10	mM	NGP-001-05	B04	CPD000058273	5901	NA	0.64	NO	0.13	NO	0.6	0.02	NO	NO	-1.27	NO
334	Tinidazole	10	mM	NGP-001-05	B05	CPD000058194	5479	DB00911	-0.09	NO	-0.62	NO	1.26	0.02	NO	NO	-1.77	NO
335	Cefaclor	10	mM	NGP-001-05	B06	CPD000058250	51039	DB00833	0.84	NO	-1.29	NO	-8.66	0.07	NO	YES	1.51	NO
336	Pinacidil monohydrate	10	mM	NGP-001-05	B07	CPD000466919	55329	NA	1.52	NO	-0.96	NO	1.62	0.03	NO	NO	-1.38	NO
337	Desoximetasone	10	mM	NGP-001-05	B08	CPD000058856	5311067	DB00547	1.97	NO	2.17	YES	0.62	0.03	NO	NO	-1.12	NO
338	MLS000758292	10	mM	NGP-001-05	B09	CPD000466279	23581818	NA	1.8	NO	8.78	YES	0.26	0.03	NO	NO	0.8	NO
339	Chlordiazepoxide	10	mM	NGP-001-05	B10	CPD000469226	2712	DB00475	1.44	NO	0.94	NO	1.73	0.03	NO	NO	-1.07	NO
340	Cyproheptadine hydrochloride	10	mM	NGP-001-05	B11	CPD000058431	13770	DB00434	3.38	YES	9.58	YES	14.01	0.15	YES	NO	6.95	YES
341	Goserelin acetate	9.6	mM	NGP-001-05	C02	CPD000469214	23581804	DB00014	-0.77	NO	0.11	NO	0.53	0.02	NO	NO	-1.25	NO
342	Palonosetron hydrochloride	10	mM	NGP-001-05	C03	CPD000469233	6918303	DB00377	-1.82	NO	2.17	YES	8.71	0.09	NO	NO	5.73	YES
343	Cortodoxone	10	mM	NGP-001-05	C04	CPD000466922	227112	NA	-0.69	NO	6.84	YES	5	0.04	NO	NO	0.86	NO
344	Xanthinol nicotinate	10	mM	NGP-001-05	C05	CPD000058741	9912	NA	-1.14	NO	0.36	NO	2.12	0.02	NO	NO	-0.61	NO
345	1-Benzylimidazole	10	mM	NGP-001-05	C06	CPD000059044	77918	DB04581	-1.22	NO	-1.25	NO	2.48	0.02	NO	NO	-0.23	NO
346	7-Nitroindazole	10	mM	NGP-001-05	C07	CPD000058266	1893	DB02207	0.06	NO	-1.05	NO	2.93	0.02	NO	NO	-1.75	NO
347	Dexchlorpheniramine maleate	7	mM	NGP-001-05	C08	CPD000471617	5281070	NA	0.54	NO	-0.12	NO	7.64	0.05	NO	NO	2.35	NO
348	Beclomethasone	10	mM	NGP-001-05	C09	CPD000466920	16218996	DB00394	0.52	NO	2.68	YES	1.56	0.03	NO	NO	-3.46	NO
349	Cefixime trihydrate	10	mM	NGP-001-05	C10	CPD000469225	23581806	DB00671	-0.62	NO	-1.39	NO	2.05	0.04	NO	NO	-3.32	NO
350	Homoharringtonine	10	mM	NGP-001-05	C11	CPD000469230	16219462	NA	-0.21	NO	71.64	YES	17.18	0.21	YES	NO	-3.18	NO
351	Secoisolariciresinol	10	mM	NGP-001-05	D02	CPD000469212	65373	NA	-0.92	NO	0.75	NO	-0.44	0.02	NO	NO	-0.73	NO
352	Naproxen sodium	10	mM	NGP-001-05	D03	CPD000058746	169117	DB00788	-0.72	NO	1.41	NO	1.69	0.02	NO	NO	-0.09	NO
353	3-Pyridinemethanol	10	mM	NGP-001-05	D04	CPD000059086	7510	NA	-1.12	NO	0.78	NO	2.69	0.03	NO	NO	0.73	NO
354	Synephrine	10	mM	NGP-001-05	D05	CPD000059111	7172	NA	-1.07	NO	0.18	NO	4.04	0.03	NO	NO	-1.28	NO
355	Duloxetine hydrochloride	8.9	mM	NGP-001-05	D06	CPD000469136	60834	DB00476	21.79	YES	33.29	YES	16.26	0.16	YES	NO	7.17	YES
356	5-Methoxytryptamine	10	mM	NGP-001-05	D07	CPD000112269	1833	NA	0.09	NO	-1.13	NO	3.61	0.05	NO	NO	-1.35	NO
357	Tocris-1355	9.9	mM	NGP-001-05	D08	CPD000466288	43345	NA	0.46	NO	-1.02	NO	3.65	0.05	NO	NO	-1.39	NO
358	Omeprazole	10	mM	NGP-001-05	D09	CPD000058847	4594	DB00338	0.39	NO	-3.25	YES	6.11	0.05	NO	NO	-1.05	NO
359	Cefdinir	10	mM	NGP-001-05	D10	CPD000469224	6398970	DB00535	-0.67	NO	-1.07	NO	3.95	0.05	NO	NO	0	NO
360	Corticosterone	10	mM	NGP-001-05	D11	CPD000058318	5753	NA	-0.97	NO	2.14	YES	3.57	0.03	NO	NO	1.37	NO
361	Raltitrexed	10	mM	NGP-001-05	E02	CPD000469217	104758	DB00293	-0.14	NO	-3.39	YES	-2.11	0.03	NO	NO	-0.01	NO
362	Mepivacaine hydrochloride	10	mM	NGP-001-05	E03	CPD000058904	66070	DB00961	-0.29	NO	-3.28	YES	1.82	0.1	NO	NO	0.1	NO
363	Haloperidol	10	mM	NGP-001-05	E04	CPD000449283	11495267	DB00502	5.41	YES	22.71	YES	8.19	0.14	YES	NO	7.67	YES
364	Resveratrol	10	mM	NGP-001-05	E05	CPD000058206	445154	DB02709	-0.21	NO	-0.99	NO	5.86	0.03	NO	NO	1.16	NO
365	Vardenafil citrate	7.2	mM	NGP-001-05	E06	CPD000469155	23581791	DB00862	-0.19	NO	0.43	NO	4.72	0.03	NO	NO	-0.18	NO
366	Phenothiazine	10	mM	NGP-001-05	E07	CPD000059045	7108	NA	5.99	YES	11.66	YES	3.38	0.06	NO	NO	2.62	NO
367	L 694247	10	mM	NGP-001-05	E08	CPD000466290	23581822	NA	0.39	NO	-0.07	NO	2.55	0.08	NO	NO	-0.76	NO
368	Dolasetron mesylate	10.4	mM	NGP-001-05	E09	CPD000469228	3033817	DB00757	0.44	NO	-0.71	NO	-1	0.05	NO	NO	-3.34	NO
369	Lofexidine hydrochloride	10	mM	NGP-001-05	E10	CPD000469232	30667	DB04948	0.09	NO	-0.79	NO	7.06	0.05	NO	NO	1.48	NO
370	Vecuronium bromide	10	mM	NGP-001-05	E11	CPD000471625	39764	DB01339	0.21	NO	-5.36	YES	1.32	0.04	NO	NO	-1.64	NO
371	Doxapram hydrochloride	10.4	mM	NGP-001-05	F02	CPD000469229	64647	DB00561	-0.29	NO	-0.91	NO	-0.58	0.04	NO	NO	1.8	NO
372	Benzbromarone	10	mM	NGP-001-05	F03	CPD000058310	2333	NA	72.32	YES	-39.41	YES	13.68	0.18	YES	NO	-1.58	NO
373	Stiripentol	10	mM	NGP-001-05	F04	CPD000449279	5311454	NA	2.6	YES	5.27	YES	5.09	0.05	NO	NO	1.81	NO
374	Maltol	10	mM	NGP-001-05	F05	CPD000059093	8369	NA	-0.74	NO	-1.16	NO	1.2	0.05	NO	NO	0.46	NO
375	Ropivacaine hydrochloride	7.7	mM	NGP-001-05	F06	CPD000469137	175804	DB00296	-0.74	NO	-2	NO	3.5	0.05	NO	NO	2.62	NO
376	2-Chloro-2-Deoxyadenosine	10	mM	NGP-001-05	F07	CPD000058553	20279	NA	-0.67	NO	-1.81	NO	1.98	0.05	NO	NO	-1.07	NO
377	AM 251	10	mM	NGP-001-05	F08	CPD000466284	2125	NA	-2.45	YES	40.16	YES	-0.97	0.13	NO	NO	1.13	NO
378	Zolmitriptan	10	mM	NGP-001-05	F09	CPD000449310	60857	DB00315	-0.77	NO	-1.29	NO	-0.81	0.08	NO	NO	0.22	NO
379	Balsalazide	10	mM	NGP-001-05	F10	CPD000469221	6335412	DB01014	-1.09	NO	-1.86	NO	1.1	0.05	NO	NO	-1.14	NO
380	Tibolone	10	mM	NGP-001-05	F11	CPD000469219	444008	NA	0.52	NO	10.15	YES	5.97	0.04	NO	NO	1.06	NO
381	RU 24969	10.1	mM	NGP-001-05	G02	CPD000466294	108028	NA	-0.36	NO	-2.3	YES	-186.65	0.99	NO	YES	3.92	NO
382	Nimodipine	10	mM	NGP-001-05	G03	CPD000058300	4497	DB00393	0.46	NO	260.41	YES	0.44	0.03	NO	NO	4.27	NO
383	Fluperlapine	10	mM	NGP-001-05	G04	CPD000449303	49381	NA	0.57	NO	2.12	YES	17.94	0.19	YES	NO	-1.76	NO
384	6-Aminoindazole	10	mM	NGP-001-05	G05	CPD000059077	81423	NA	-0.64	NO	-1.63	NO	2.67	0.02	NO	NO	-0.24	NO
385	Anastrozole	10	mM	NGP-001-05	G06	CPD000466301	2187	DB01217	-0.82	NO	-1.94	NO	3.64	0.03	NO	NO	0.04	NO
386	Granisetron hydrochloride	9	mM	NGP-001-05	G07	CPD000469138	6918003	DB00889	-0.57	NO	-1.22	NO	2.25	0.04	NO	NO	0.28	NO
387	HTMT	10	mM	NGP-001-05	G08	CPD000466289	23581821	NA	-0.06	NO	1.41	NO	2.58	0.05	NO	NO	-0.79	NO
388	Tremulacin	10	mM	NGP-001-05	G09	CPD000469223	442544	NA	-0.72	NO	-1.16	NO	3.04	0.03	NO	NO	-1.23	NO
389	Olopatadine hydrochloride	12.7	mM	NGP-001-05	G10	CPD000469220	5282402	DB00768	-0.74	NO	-1.29	NO	1.08	0.06	NO	NO	-0.7	NO
390	Nicotinamide	10	mM	NGP-001-05	G11	CPD000058212	936	DB02701	-0.49	NO	-0.97	NO	4.17	0.02	NO	NO	0.03	NO
391	Brucine	10	mM	NGP-001-05	H02	CPD000112281	442021	NA	0.41	NO	-0.99	NO	-1.75	0.04	NO	NO	0.05	NO
392	Rolitetracycline	10	mM	NGP-001-05	H03	CPD000058701	6420073	DB01301	-1.17	NO	-1.77	NO	-26.95	0.11	NO	YES	3.05	NO
393	Oxyphenonium bromide	10	mM	NGP-001-05	H04	CPD000058660	5748	DB00219	0.39	NO	-1.02	NO	0.76	0.04	NO	NO	1.35	NO
394	Enrofloxacin	10	mM	NGP-001-05	H05	CPD000059011	71188	NA	3.15	YES	37.48	YES	2.66	0.04	NO	NO	1.36	NO
395	Ketotifen fumarate	8.9	mM	NGP-001-05	H06	CPD000058462	5282408	DB00920	0.49	NO	-0.77	NO	4.44	0.04	NO	NO	2.1	NO
396	Rimcazole	10.1	mM	NGP-001-05	H07	CPD000466293	18528119	NA	89.38	YES	20.27	YES	14.39	0.18	YES	NO	-2.16	NO
397	MLS000758257	10	mM	NGP-001-05	H08	CPD000466286	23581820	NA	0.31	NO	0.66	NO	-1.42	0.03	NO	NO	2.29	NO
398	Dactinomycin	10	mM	NGP-001-05	H09	CPD000469227	457193	DB00970	1.17	NO	-0.59	NO	-22.42	0.09	NO	YES	0.61	NO
399	Livalo	5	mM	NGP-001-05	H10	CPD000469287	11251522	NA	15.71	YES	32.16	YES	0.3	0.09	NO	NO	-3.02	NO
400	Nialamide	10	mM	NGP-001-05	H11	CPD000059131	4472	DB04820	0.19	NO	-0.06	NO	1.74	0.02	NO	NO	-1.89	NO
401	Vindesine sulfate	9.7	mM	NGP-001-06	A02	CPD000469153	5388992	DB00309	-1.39	NO	-0.81	NO	-5.76	0.11	NO	YES	0.99	NO
402	Clofazimine	10	mM	NGP-001-06	A03	CPD000058704	2794	DB00845	61.31	YES	108.31	YES	0.66	0.24	NO	NO	-1.5	NO
403	Clobenpropit	10	mM	NGP-001-06	A04	CPD000469632	2790	NA	0.09	NO	0.21	NO	1.25	0.07	NO	NO	-0.07	NO
404	Imatinib mesylate	8.4	mM	NGP-001-06	A05	CPD000469175	123596	DB00619	0.53	NO	7.33	YES	7.85	0.14	YES	NO	-0.26	NO
405	Telithromycin	10	mM	NGP-001-06	A06	CPD000469222	11693521	DB00976	0.09	NO	4.79	YES	4.62	0.05	NO	NO	0.14	NO
406	SDM25N	10.1	mM	NGP-001-06	A07	CPD000466297	23581824	NA	0.61	NO	11.14	YES	4.94	0.22	NO	NO	3.9	NO
407	Vincristine sulfate	8.2	mM	NGP-001-06	B02	CPD000058540	43116	NA	-1.99	NO	-1.31	NO	1.03	0.03	NO	NO	0.23	NO
408	Irinotecan hydrochloride	8.7	mM	NGP-001-06	B03	CPD000469166	23581792	NA	-1.27	NO	2.14	YES	-55.22	0.62	NO	YES	0.6	NO
409	Huperzine a	10	mM	NGP-001-06	B04	CPD000469231	449069	NA	-1.79	NO	1.24	NO	3.17	0.02	NO	NO	-0.7	NO
410	Metylperon	10	mM	NGP-001-06	B05	CPD000468736	9926325	NA	1.93	NO	1	NO	4.44	0.03	NO	NO	0.9	NO
411	CCPA	10	mM	NGP-001-06	B06	CPD000468732	23581815	DB00541	-0.39	NO	-0.11	NO	3.7	0.02	NO	NO	-0.08	NO
412	DuP 697	10	mM	NGP-001-06	B07	CPD000466299	3177	DB00762	-0.63	NO	8.97	YES	12.06	0.08	NO	NO	1.98	NO
413	Lacidipine	10	mM	NGP-001-06	C02	CPD000466342	5311217	NA	-1.71	NO	10.25	YES	6.44	0.04	NO	NO	0.32	NO
414	Lansoprazole	10.1	mM	NGP-001-06	C03	CPD000058469	3883	NA	1.37	NO	2.67	YES	14.21	0.08	NO	NO	1.42	NO
415	Sibutramine hydrochloride	10	mM	NGP-001-06	C04	CPD000472527	64764	NA	1.85	NO	6.62	YES	8.57	0.05	NO	NO	0.96	NO
416	Parecoxib	9.8	mM	NGP-001-06	C05	CPD000469594	9576744	NA	-0.35	NO	0.73	NO	5.02	0.02	NO	NO	0.05	NO
417	PD 81723	10	mM	NGP-001-06	C06	CPD000468734	122028	NA	9.52	YES	142.78	YES	11.12	0.12	YES	NO	1.22	NO
418	5-Nonyloxytryptamine	9.9	mM	NGP-001-06	C07	CPD000466300	23581825	NA	-64.97	YES	-38.93	YES	-7.64	0.3	NO	YES	-2.09	NO
419	Mirtazapine	10	mM	NGP-001-06	D02	CPD000466347	4205	NA	-0.03	NO	2.89	YES	12.69	0.1	NO	NO	3.31	NO
420	Desloratadine	10	mM	NGP-001-06	D03	CPD000149358	124087	NA	-0.47	NO	60.07	YES	8.67	0.09	NO	NO	1.24	NO
421	Lorazepam	10	mM	NGP-001-06	D04	CPD000058410	3958	NA	-0.91	NO	2.16	YES	5	0.02	NO	NO	0.95	NO
422	Pergolide mesylate	10	mM	NGP-001-06	D05	CPD000058504	47812	DB00448	2.05	YES	3.13	YES	-15.99	0.13	NO	YES	-0.45	NO
423	Stanozolol	10	mM	NGP-001-06	D06	CPD000058878	25249	DB01105	1.13	NO	9.25	YES	-4.38	0.04	NO	NO	-0.39	NO
424	Salmeterol	10	mM	NGP-001-06	D07	CPD000466295	5152	NA	3.81	YES	41.23	YES	10.54	0.1	NO	NO	0.79	NO
425	Ampiroxicam	10	mM	NGP-001-06	E02	CPD000469285	2176	NA	-0.19	NO	-0.54	NO	3.3	0.02	NO	NO	1.18	NO
426	CPD000058772	10	mM	NGP-001-06	E03	CPD000058772	9919	NA	-0.87	NO	0.01	NO	4.09	0.02	NO	NO	1.4	NO
427	CPD000469633	10	mM	NGP-001-06	E04	CPD000469633	23581829	NA	1.45	NO	3.73	YES	19.09	0.15	YES	NO	-0.57	NO
428	Atracurium besylate	10	mM	NGP-001-06	E05	CPD000471626	47320	NA	-0.31	NO	-2.52	YES	17.91	0.13	YES	NO	0.87	NO
429	Zaleplon	10	mM	NGP-001-06	E06	CPD000238180	5719	NA	-0.43	NO	-0.13	NO	6.36	0.02	NO	NO	-0.58	NO
430	SB 205607	9.8	mM	NGP-001-06	E07	CPD000466296	23581823	NA	0.13	NO	-2.02	YES	5.85	0.03	NO	NO	0.28	NO
431	Glimepiride	7.7	mM	NGP-001-06	F02	CPD000466368	3476	DB00370	-0.03	NO	1.1	NO	0.5	0.02	NO	NO	1.27	NO
432	Mifepristone	10	mM	NGP-001-06	F03	CPD000058481	55245	NA	-2.51	YES	172.1	YES	9.91	0.06	NO	NO	2.99	NO
433	CPD000469631	10	mM	NGP-001-06	F04	CPD000469631	23581827	DB00186	-0.79	NO	-0.69	NO	2.98	0.03	NO	NO	1.26	NO
434	Artemether	10	mM	NGP-001-06	F05	CPD000469218	68911	DB01186	17.59	YES	9.66	YES	7.92	0.08	NO	NO	-0.64	NO
435	Prostaglandin E1	10	mM	NGP-001-06	F06	CPD000112594	5280723	NA	-0.67	NO	0.11	NO	6.45	0.04	NO	NO	1.5	NO
436	SCH-23390 hydrochloride	9.9	mM	NGP-001-06	F07	CPD000326935	11957535	DB00938	-0.55	NO	0.38	NO	15.94	0.12	YES	NO	3.2	NO
437	Amlodipine base	13.9	mM	NGP-001-06	G02	CPD000469198	2162	NA	14.16	YES	-38.93	YES	5.4	0.2	YES	NO	4.11	NO
438	Etoposide	10	mM	NGP-001-06	G03	CPD000112002	36462	NA	0.01	NO	59.18	YES	3.42	0.02	NO	NO	0.11	NO
439	Amiodarone hydrochloride	9.5	mM	NGP-001-06	G04	CPD000058296	441325	NA	125.61	YES	-38.93	YES	7.12	0.09	NO	NO	-0.63	NO
440	Ebselen	10	mM	NGP-001-06	G05	CPD000058445	3194	NA	-64.97	YES	-16.85	YES	-6.52	0.29	NO	YES	-0.37	NO
441	Testosterone	10	mM	NGP-001-06	G06	CPD000058344	6013	NA	4.61	YES	44.54	YES	21.12	0.16	YES	NO	-0.83	NO
442	Rabeprazole	10.6	mM	NGP-001-06	H02	CPD000469174	5029	NA	12.2	YES	31.51	YES	11.41	0.2	YES	NO	3.07	NO
443	Sibutramine	11.3	mM	NGP-001-06	H03	CPD000238156	5210	NA	3.69	YES	5.47	YES	3.27	0.05	NO	NO	1.61	NO
444	Mevastatin	10	mM	NGP-001-06	H04	CPD000336944	64715	DB00732	2.89	YES	129.7	YES	0.51	0.1	NO	NO	1.32	NO
445	CGS 12066B	10	mM	NGP-001-06	H05	CPD000468733	6438352	DB00962	350.75	YES	-38.93	YES	-6.49	0.24	NO	YES	-0.17	NO
446	Dehydroepiandrosterone	10	mM	NGP-001-06	H06	CPD000059075	23581830	NA	7.64	YES	70.87	YES	15.73	0.13	YES	NO	3.07	NO
