# Supplementary material for: Cationic Amphiphilic Drugs Are Potent Inhibitors of Yeast Sporulation
Source: PLoS One. 2012 Aug 8;7(8):e42853. doi: 10.1371/journal.pone.0042853 (PMC3414501; doi:10.1371/journal.pone.0042853)
Supplement: Table S2 — Complete set of metabolome data for tripelennamine-treated sporulating cells. Concentrations (given in [µmol/g of dry weight]) of 37 metabolites involved in glycolysis, TCA and glyoxylate cycle, nucleotide metabolism, and reserve carbohydrate metabolism were quantified by IC-MS analyses (see Methods). Data for duplicate samples (sample 1 and sample 2, respectively), for cells sporulated for 0, 5, 9, and 24 hours in the presence or absence of tripelennamine (+TA and –TA, respectively) are listed. Missing values are indicated by ‘NA’. (XLS) [file pone.0042853.s007.xls]

## Sheet: Table S2
Concentrations [µmol/g of dry weight]	Samples
metabolite	sample 1 at 0h	sample 2 at 0h	sample 1 at 5h - TA	sample 2 at 5h - TA	sample 1 at 5h + TA	sample 2 at 5h + TA	sample 1 at 9h - TA	sample 2 at 9h - TA	sample 1 at 9h + TA	sample 2 at 9h + TA	sample 1 at 24h - TA	sample 2 at 24h - TA	sample 1 at 24h + TA	sample 2 at 24h + TA
adenosine triphosphate	1.15029	1.26539	1.7566	2.14003	2.10612	1.87303	2.59947	2.47487	1.91654	1.51618	1.35425	1.61546	0.00842742	0.00562813
adenosine diphosphate	0.621158	0.368023	1.07041	1.26694	0.97789	1.05088	1.14643	1.24277	1.01561	0.840752	0.437806	0.527496	0.0257446	0.0259281
adenosine monophosphate	1.10012	0.354817	1.14204	1.11162	1.09954	1.15237	1.05382	1.33677	1.43071	1.25405	0.323408	0.319408	0.104605	0.100694
pyruvate	6.02135	1.11664	7.32166	7.5578	3.17241	8.69156	7.19874	6.42755	12.6668	7.36976	7.44137	6.52194	6.7053	6.64166
fumarate	14.7469	13.1526	37.1601	35.9337	56.6373	50.2158	35.3164	36.9113	30.4311	32.824	8.90272	9.29091	3.70393	3.8273
succinate	44.784	31.8122	77.0588	49.3283	39.0405	31.6726	44.3129	38.9007	26.7345	29.8016	13.512	13.479	14.8485	14.5696
malate	43.6213	39.434	102.084	99.8332	128.653	113.003	93.1474	99.0023	91.9071	95.0156	34.7046	40.2075	11.9607	11.521
alpha-ketoglutarate	5.68469	1.75638	9.24861	12.4578	48.3748	34.1938	13.4237	8.24459	28.0667	18.7932	5.01763	4.35238	10.8777	11.6686
phosphoenolpyruvate	15.7451	6.1801	5.83139	5.82576	6.68866	5.71937	5.87574	6.95633	7.64147	4.81962	3.64091	3.01767	1.96931	1.75493
glycerol 3-phosphate	7.9948	4.89341	9.02705	13.9578	5.40927	6.05296	15.3158	17.8492	5.54959	7.75402	16.2193	15.1137	0.998821	1.29328
aconitate	20.8799	12.5918	487.654	489.825	327.274	331.815	341.044	304.043	213.523	182.189	101.68	111.922	26.8902	26.3031
3-phosphoglycerate	NA	11.4348	9.2681	8.34434	10.401	8.86957	NA	NA	NA	NA	4.03097	3.63179	2.95923	2.53739
1,3-diphosphoglycerate	NA	6.12889	4.88869	6.34185	3.41879	3.21948	NA	NA	NA	NA	0.886343	0.837424	0	0
citrate	104.244	78.9487	372.577	366.711	273.272	240.585	405.839	388.997	194.361	166.289	133.93	145.372	47.1141	46.0117
isocitrate	25.3148	21.0909	68.2443	65.1664	39.7594	32.9725	49.9535	54.7439	21.9201	20.2726	12.75	14.5714	2.17249	1.77026
ribose 1-phosphate	0.36026	0.785076	1.20354	1.39135	0.776246	0.86375	2.13966	2.57198	1.47391	1.45875	0.730248	0.771281	1.55721	2.18983
ribose 5-phosphate	0.250517	0.123548	0.32421	0.335944	0.364359	0.26771	0.332453	0.371475	0.390367	0.354125	0.208368	0.254835	0.0290268	0.0380726
glucose 1-phosphate	0.762655	0.627646	1.1348	1.27115	0.924381	0.636031	2.12458	2.29603	1.27944	1.34204	0.478364	0.547102	0.668396	0.845663
glucose 6-phosphate	10.7328	6.50801	3.07824	2.42596	3.05204	1.91178	19.7066	23.0881	13.9568	13.7485	6.7009	7.54208	0.358487	0.321733
fructose 6-phosphate	4.28725	2.85082	9.27408	10.3168	9.21748	7.43533	6.69465	6.02839	3.29257	4.23335	1.3493	1.48217	0.0988792	0.076157
mannose 6-phosphate	8.84675	4.88965	13.3042	14.8	13.223	10.6664	19.003	20.8583	12.8666	13.3753	7.70613	8.9721	0.273717	0.284506
6-phosphogluconate	1.70585	0.271479	1.28813	1.5673	0.755287	0.704507	0.959077	0.850133	1.37002	1.16156	0.389204	0.385489	0.14643	0.128771
sedoheptulose 7-phosphate	47.852	19.6077	73.5192	78.5748	88.2484	72.4851	89.0528	103.465	127.784	127.318	32.0082	39.0102	40.853	42.5755
uridine monophosphate	1.21021	0.818136	1.87952	2.21043	1.90792	1.67316	4.71766	5.17928	2.76872	2.75628	2.1846	2.16608	0.123169	0.112652
uridine diphosphate	0.97786	0.476108	1.73826	1.87297	1.42572	1.58339	1.75354	1.9293	1.93946	1.68192	0.966051	1.05345	0.0480017	0.0340879
uridine triphosphate	2.04591	2.52999	2.93013	3.35381	3.24384	2.97593	4.40154	3.7902	3.79125	3.70519	3.33841	3.52858	0.018953	0.016033
cytidine diphosphate	0.0529634	0.0111197	0.121359	0.144507	0.102983	0.135348	0.131348	0.127188	0.135276	0.0968005	0.0457886	0.0506877	0	0
cytidine triphosphate	0.621399	0.454166	1.54154	1.74847	1.86057	1.41696	2.17041	2.09579	1.50885	1.29583	1.06552	1.17138	0.00951499	0.00782459
inosine monophosphate	0.0471052	0.0587056	0.00432495	0.00404961	0.0525132	0.0559243	0.17965	0.172388	0.354848	0.514905	0.00223774	0.00311283	0.00637125	0.0063748
guanosine monophosphate	0.11951	0.0568101	0.271069	0.259284	0.190437	0.190847	0.169528	0.195945	0.192026	0.18272	0.054703	0.0498043	0.0474657	0.0511574
guanosine diphosphate	0.621158	0.368023	1.07041	1.26694	0.97789	1.05088	1.14643	1.24277	1.01561	0.840752	0.437806	0.527496	0.0257446	0.0259281
guanosine triphosphate	1.14851	1.26344	1.75389	2.13672	2.10287	1.87014	2.59546	2.47105	1.91358	1.51384	1.35216	1.61296	0.0084144	0.00561944
cyclic adenosine monophosphate	0.00108981	0.00147824	0.00347526	0.00352778	0.00493238	0.00279876	0.00509329	0.00443385	0.00484835	0.0045463	0.00495093	0.00566597	0	0
fructose 1,6-biphosphate	3.61307	2.24886	5.34688	6.41723	5.78123	5.19493	9.21795	8.10278	9.59856	8.01152	4.90761	5.03952	0.058772	0.0473985
trehalose 6-phosphate	3.21972	3.05516	18.6255	17.5764	23.0231	23.287	65.4138	80.753	39.2332	35.8604	16.756	19.49	0.39298	0.495125
cytidine monophospahet	0.0920963	0.0445447	0.112653	0.11887	0.0900463	0.0837619	0.0302398	0.0299124	0.0361403	0.0392879	0.00371412	0.00705211	0	0
shikimate3P	0.251775	0.3067	5.76131	6.24525	9.06184	8.71816	1.03083	1.22737	2.88203	2.59278	0.361819	0.442772	0.975909	0.855035
